# Supplementary material for: Covalent cannabinoid receptor ligands – structural insight and selectivity challenges
Source: Royal Society of Chemistry journal article supplement (doi:10.1039/d2md00006g), 2022-01-01
Supplement: d2md00006g1.pdf [file d2md00006g1.pdf]

## Supplementary Information

Covalent cannabinoid receptor ligands – structural insight and selectivity challenges.

Ian Liddle,<sup>A</sup> Michelle Glass,<sup>B</sup> Joel D. A. Tyndall,<sup>C</sup> Andrea J. Vernal<sup>A,D</sup>

<sup>A</sup> Department of Chemistry, University of Otago, Dunedin, New Zealand

<sup>B</sup> Department of Pharmacology and Toxicology, University of Otago, Dunedin, New Zealand

<sup>C</sup> School of Pharmacy, University of Otago, Dunedin, New Zealand

<sup>D</sup> Corresponding author, [andrea.vernall@otago.ac.nz](mailto:andrea.vernall@otago.ac.nz). Ph: 64 3 479 5214.

| Ligand                       | Reported Data<br>$K_i$ , $K_B$ , $IC_{50}$ (nM)<br>or $pK_i$ ,<br>$\pm$ error/confidence limit<br>range | Species, Receptor,<br>Membrane                              | [ <sup>3</sup> H] Radioligand<br>(concentration in nM)<br>and $K_d$ (nM) or<br>reference cited to<br>conditions used,<br>where provided | Data<br>reported<br>in<br>reference |
|------------------------------|---------------------------------------------------------------------------------------------------------|-------------------------------------------------------------|-----------------------------------------------------------------------------------------------------------------------------------------|-------------------------------------|
| <b>Biaryl pyrazole</b>       |                                                                                                         |                                                             |                                                                                                                                         |                                     |
| AM251                        | $K_i = 7.49$ (6.38 – 8.78)                                                                              | rCB <sub>1</sub> R forebrain<br>membranes                   | CP55,940 (0.8)                                                                                                                          | Lan <i>et al.</i>                   |
|                              | $K_i = 2290$ (1640 – 3190)                                                                              | mCB <sub>2</sub> R spleen                                   | As described in Drake<br><i>et al.</i> and<br>Charalambous <i>et al.</i>                                                                |                                     |
| SR141716A<br>(Rimonabant)    | $K_i = 11.5$ (8.45 – 13.7)                                                                              | rCB <sub>1</sub> R forebrain<br>membranes                   | CP55,940 (0.35)                                                                                                                         | Howlett <i>et al.</i>               |
|                              | $K_i = 1640$ (1440 – 1850)                                                                              | mCB <sub>2</sub> R spleen                                   |                                                                                                                                         |                                     |
| <b>1</b>                     | $IC_{50} = 56$                                                                                          | rCB <sub>1</sub> R forebrain<br>membranes                   | CP55,940 (0.8)                                                                                                                          | Howlett <i>et al.</i>               |
|                              | $IC_{50} = 394 \pm 124$                                                                                 | mCB <sub>2</sub> R spleen                                   |                                                                                                                                         |                                     |
| <b>2</b>                     | $IC_{50} = 28$                                                                                          | rCB <sub>1</sub> R forebrain<br>membranes                   | CP55,940 (0.35)                                                                                                                         | Howlett <i>et al.</i>               |
|                              | $IC_{50} = 1490 \pm 439$                                                                                | mCB <sub>2</sub> R spleen                                   |                                                                                                                                         |                                     |
| <b>3</b>                     | $IC_{50} = 210$                                                                                         | rCB <sub>1</sub> R forebrain<br>membranes                   | CP55,940 (0.35)                                                                                                                         | Howlett <i>et al.</i>               |
|                              | $IC_{50} = 1110 \pm 161$                                                                                | mCB <sub>2</sub> R spleen                                   |                                                                                                                                         |                                     |
| <b>4</b>                     | $IC_{50} = 130$                                                                                         | rCB <sub>1</sub> R forebrain<br>membranes                   | CP55,940 (0.35)                                                                                                                         | Howlett <i>et al.</i>               |
|                              | $IC_{50} = 5970 \pm 413$                                                                                | mCB <sub>2</sub> R spleen                                   |                                                                                                                                         |                                     |
| AM6538                       | $K_i = 3.4 \pm 1.0$                                                                                     | hCB <sub>1</sub> R HEK293F                                  | CP55,940 (0.79)<br>$K_d = 5.6 \pm 2.3$                                                                                                  | Hua <i>et al.</i><br>2016.          |
| <b>Aryl pyrazoles</b>        |                                                                                                         |                                                             |                                                                                                                                         |                                     |
| AM263                        | $K_i = 23$                                                                                              | rCB <sub>1</sub> R brain<br>membranes                       | CP55,940 (0.35)<br>As described in Shim <i>et al.</i>                                                                                   | Shim <i>et al.</i>                  |
|                              | $K_i = 26.8$                                                                                            | mCB <sub>2</sub> R spleen                                   | CP55,940 (0.8)<br>As described in<br>Makriyannis <i>et al.</i>                                                                          | Chen <i>et al.</i>                  |
| <b>5</b>                     | $IC_{50} = 82$                                                                                          | rCB <sub>1</sub> R forebrain<br>membranes                   | CP55,940 (0.35)                                                                                                                         | Howlett <i>et al.</i>               |
|                              | $IC_{50} = 20.7 \pm 2.3$                                                                                | mCB <sub>2</sub> R spleen                                   |                                                                                                                                         |                                     |
| <b>6</b>                     | $IC_{50} = 46$                                                                                          | rCB <sub>1</sub> R forebrain<br>membranes                   | CP55,940 (0.35)                                                                                                                         | Howlett <i>et al.</i>               |
|                              | $IC_{50} = 22.6 \pm 3.1$                                                                                | mCB <sub>2</sub> R spleen                                   |                                                                                                                                         |                                     |
| AM10257                      | $K_i = 13$                                                                                              | hCB <sub>1</sub> HEK293F                                    | CP55,940 (0.79)                                                                                                                         | Li <i>et al.</i>                    |
|                              | $K_i = 0.075$ (0.063 – 0.09) <sup>a</sup>                                                               | hCB <sub>2</sub> R HEK293F <sup>a</sup> and<br>Sf9 membrane | CP55,940<br>$K_d = 0.86$                                                                                                                |                                     |
| AM6731                       | $K_i = 0.54$ (0.42–0.70)                                                                                | hCB <sub>2</sub> -HEK293                                    | CP55,940<br>$K_d = 0.62$ (0.51–0.73)                                                                                                    | Mercier <i>et al.</i>               |
| AM1336                       | $K_i = 0.63$ (0.44 - 0.81)                                                                              |                                                             |                                                                                                                                         |                                     |
| AM6720                       | $K_i = 1.03$ (0.85 – 1.25)                                                                              |                                                             |                                                                                                                                         |                                     |
| <b>Tricyclic Cannabinols</b> |                                                                                                         |                                                             |                                                                                                                                         |                                     |
| AM11542                      | $K_i = 0.11$ (0.09–0.13)                                                                                | hCB <sub>1</sub> R HEK293F                                  | CP55,940 (0.79)<br>$K_d = 5.6 \pm 2.3$                                                                                                  | Hua <i>et al.</i><br>2020.          |
| AM841                        | $K_i = 1.14$ (0.85–1.54)                                                                                | hCB <sub>1</sub> R HEK293F                                  | CP55,940 (0.79)<br>$K_d = 5.6 \pm 2.3$                                                                                                  | Hua <i>et al.</i><br>2016.          |
|                              | $K_i = 9.05 \pm 2.06$                                                                                   | hCB <sub>1</sub> -CHO-K1                                    | CP55,940 (3.0)<br>$K_d = 6.7 \pm 0.34$                                                                                                  | Picone <i>et al.</i>                |
|                              | $K_i = 1.51$ (1.17–1.93)                                                                                | hCB <sub>2</sub> R HEK293                                   | CP55,940 (0.76)<br>$K_d = 0.67$ (0.51 – 0.83)                                                                                           | Pei <i>et al.</i>                   |
|                              | $K_i = 4.5$ (3.8-5.3)                                                                                   |                                                             | WIN55212-2 (0.91)<br>$K_d = 3.54$ (2.27 – 4.80)                                                                                         |                                     |

| Ligand  | Reported Data<br>$K_i$ , $K_B$ , $IC_{50}$ (nM)<br>or $pK_i$ ,<br>$\pm$ error/confidence limit<br>range | Species, Receptor,<br>Membrane                  | [ <sup>3</sup> H] Radioligand<br>(concentration in nM)<br>and $K_d$ (nM) or<br>reference cited to<br>conditions used,<br>where provided | Data<br>reported<br>in<br>reference |
|---------|---------------------------------------------------------------------------------------------------------|-------------------------------------------------|-----------------------------------------------------------------------------------------------------------------------------------------|-------------------------------------|
| AM4073  | $K_i = 3.3$ (1.9 – 5.7)                                                                                 | hCB <sub>2</sub> R HEK293                       | CP55,940<br>$K_d = 2.1$ (1.8–2.3)<br>As described in Pei <i>et al.</i>                                                                  | Zhou <i>et al.</i>                  |
| AM4099  | $K_i = 12.6$ (9.0 – 17.5)                                                                               |                                                 |                                                                                                                                         |                                     |
| 7       | $K_i = 0.4 \pm 0.1$                                                                                     | rCB <sub>1</sub> R brain membranes              | CP55,940<br>As described in Nikas <i>et al.</i>                                                                                         | Jiang <i>et al.</i>                 |
|         | $K_i = 1.1 \pm 0.1$                                                                                     | mCB <sub>2</sub> R HEK293                       |                                                                                                                                         |                                     |
|         | $K_i = 1.0 \pm 0.2$                                                                                     | hCB <sub>2</sub> R HEK293                       |                                                                                                                                         |                                     |
| 8       | $K_i = 37.6 \pm 0.6$                                                                                    | rCB <sub>1</sub> R brain membranes              |                                                                                                                                         |                                     |
|         | $K_i = 14.6 \pm 2.1$                                                                                    | mCB <sub>2</sub> R HEK293                       |                                                                                                                                         |                                     |
|         | $K_i = 4.2 \pm 0.3$                                                                                     | hCB <sub>2</sub> R HEK293                       |                                                                                                                                         |                                     |
| 9       | $K_i = 0.41 \pm 0.05$                                                                                   | rCB <sub>1</sub> R brain membranes              |                                                                                                                                         |                                     |
|         | $K_i = 0.8 \pm 0.1$                                                                                     | mCB <sub>2</sub> R HEK293                       |                                                                                                                                         |                                     |
|         | $K_i = 1.40 \pm 0.06$                                                                                   | hCB <sub>2</sub> R HEK293                       |                                                                                                                                         |                                     |
| AM993   | $K_i = 18.6$                                                                                            | rCB <sub>1</sub> R brain membranes              | CP55,940<br>As described in Nikas <i>et al.</i>                                                                                         | Ogawa <i>et al.</i>                 |
|         | $K_i = 38.4$                                                                                            | mCB <sub>2</sub> R HEK293                       |                                                                                                                                         |                                     |
|         | $K_i = 24.8$                                                                                            | hCB <sub>2</sub> R HEK293                       |                                                                                                                                         |                                     |
| AM994   | $K_i = 35.4$                                                                                            | rCB <sub>1</sub> R brain membranes              |                                                                                                                                         |                                     |
|         | $K_i = 31.7$                                                                                            | mCB <sub>2</sub> R HEK293                       |                                                                                                                                         |                                     |
|         | $K_i = 13.1$                                                                                            | hCB <sub>2</sub> R HEK293                       |                                                                                                                                         |                                     |
| AM10509 | $K_i = 2.3$                                                                                             | rCB <sub>1</sub> R brain membranes              | CP55,940<br>As described in Ogawa <i>et al.</i>                                                                                         | Ho <i>et al.</i>                    |
|         | $K_i = 2.9$                                                                                             | mCB <sub>2</sub> R HEK293                       |                                                                                                                                         |                                     |
|         | $K_i = 3.1$                                                                                             | hCB <sub>2</sub> R HEK293                       |                                                                                                                                         |                                     |
| AM10504 | $K_i = 4.8$                                                                                             | rCB <sub>1</sub> R brain membranes              |                                                                                                                                         |                                     |
|         | $K_i = 9.5$                                                                                             | mCB <sub>2</sub> R HEK293                       |                                                                                                                                         |                                     |
|         | $K_i = 3.6$                                                                                             | hCB <sub>2</sub> R HEK293                       |                                                                                                                                         |                                     |
| AM967   | $K_i = 1254$                                                                                            | rCB <sub>1</sub> R brain membranes              | CP55,940<br>As described in Krishnamurthy <i>et al.</i>                                                                                 | Dixon <i>et al.</i>                 |
|         | $K_i = 34.2$                                                                                            | mCB <sub>2</sub> R HEK293                       |                                                                                                                                         |                                     |
|         | $K_i = 124.8$                                                                                           | hCB <sub>2</sub> R HEK293                       |                                                                                                                                         |                                     |
| 10      | $K_i = 156.6$                                                                                           | rCB <sub>1</sub> R brain membranes              |                                                                                                                                         |                                     |
|         | $K_i = 152.1$                                                                                           | mCB <sub>2</sub> R HEK293                       |                                                                                                                                         |                                     |
|         | $K_i = 124.8$                                                                                           | hCB <sub>2</sub> R HEK293                       |                                                                                                                                         |                                     |
| HU-308  | $K_i > 10000$                                                                                           | rCB <sub>1</sub> brain (synaptosomal) membranes | HU-243                                                                                                                                  | Hanuš <i>et al.</i>                 |
|         | $K_i = 22.7 \pm 3.9$                                                                                    | hCB <sub>2</sub> R COS-7                        | HU-243                                                                                                                                  |                                     |

| Ligand                     | Reported Data<br>$K_i$ , $K_B$ , $IC_{50}$ (nM)<br>or $pK_i$ ,<br>$\pm$ error/confidence limit<br>range | Species, Receptor,<br>Membrane | [ <sup>3</sup> H] Radioligand<br>(concentration in<br>nM) and $K_d$ (nM)<br>or reference cited<br>to conditions used,<br>where provided | Data<br>reported in<br>reference                        |
|----------------------------|---------------------------------------------------------------------------------------------------------|--------------------------------|-----------------------------------------------------------------------------------------------------------------------------------------|---------------------------------------------------------|
| 11                         | $K_i = 2670$                                                                                            | hCB <sub>1</sub> R CHO         | CP55,940<br>As described in<br>Soethoudt <i>et al.</i><br>2017.                                                                         | Westphal <i>et al.</i>                                  |
|                            | $K_i = 158$                                                                                             | mCB <sub>2</sub> R CHO         |                                                                                                                                         |                                                         |
|                            | $K_i = 13.1$                                                                                            | hCB <sub>2</sub> R CHO         |                                                                                                                                         |                                                         |
| 12                         | $K_i = 1130$                                                                                            | hCB <sub>1</sub> R CHO         |                                                                                                                                         |                                                         |
|                            | $K_i = 40$                                                                                              | mCB <sub>2</sub> R CHO         |                                                                                                                                         |                                                         |
|                            | $K_i = 3.7$                                                                                             | hCB <sub>2</sub> R CHO         |                                                                                                                                         |                                                         |
| 13                         | $K_i = 357$                                                                                             | hCB <sub>1</sub> R CHO         |                                                                                                                                         |                                                         |
|                            | $K_i = 417$                                                                                             | mCB <sub>2</sub> R CHO         |                                                                                                                                         |                                                         |
|                            | $K_i = 96$                                                                                              | hCB <sub>2</sub> R CHO         |                                                                                                                                         |                                                         |
| RO7239315                  | $K_i = 3890$                                                                                            | hCB <sub>1</sub> R CHO         | CP55,940<br>As described in<br>Soethoudt <i>et al.</i><br>2017.                                                                         | Westphal <i>et al.</i><br>Soethoudt <i>et al.</i> 2018. |
|                            | $K_i = 88$                                                                                              | mCB <sub>2</sub> R CHO         |                                                                                                                                         |                                                         |
|                            | $K_i = 9.3$                                                                                             | hCB <sub>2</sub> R CHO         |                                                                                                                                         |                                                         |
| <b>Aryl Pyridinyl</b>      |                                                                                                         |                                |                                                                                                                                         |                                                         |
| LE101                      | $pK_i = <5$                                                                                             | hCB <sub>1</sub> R CHOK        | CP55,940 As<br>described in<br>Mukhopadhyay <i>et al.</i>                                                                               | Soethoudt <i>et al.</i> 2018                            |
|                            | $pK_i = 7.5 \pm 0.1$                                                                                    | hCB <sub>2</sub> R CHOK        |                                                                                                                                         |                                                         |
| LEI121                     | $pK_i = <5$                                                                                             | hCB <sub>1</sub> R CHOK        | CP55,940 (1.5)<br>As described in<br>Dixon <i>et al.</i>                                                                                | Soethoudt <i>et al.</i> 2018.                           |
|                            | $pK_i = 7.2 \pm 0.4$                                                                                    | hCB <sub>2</sub> R CHOK        |                                                                                                                                         |                                                         |
| LEI120                     | $pK_i = 6.9 \pm 0.3$                                                                                    | hCB <sub>2</sub> R CHOK        | CP55,940 (1.5)<br>As described in<br>Dixon <i>et al.</i>                                                                                | Soethoudt <i>et al.</i> 2018.                           |
| <b>Indole Carboxamides</b> |                                                                                                         |                                |                                                                                                                                         |                                                         |
| ORG27569                   | $K_B = 217.3$ (170.3 –<br>277.2)<br>$\alpha = 6.95$                                                     | hCB <sub>1</sub> R HEK293      | CP55,940<br>As described in Ahn<br><i>et al.</i>                                                                                        | Ahn. <i>et al.</i>                                      |

## References

- K. H. Ahn, M. M. Mahmoud and D. A. Kendall, *J. Biol. Chem.*, 2012, **287**, 12070-12082.
- A. Charalambous, Y. Guo, D. B. Houston, A.C. Howlett, D.R. Compton, B.R. Martin, A. Makriyannis, *J. Med. Chem.* 1992, **35**, 3076-3079.
- J.-Z. Chen, X.-W. Han, Q. Liu, A. Makriyannis, J. Wang and X.-Q. Xie, *J. Med. Chem.*, 2006, **49**, 625-636.
- D. D. Dixon, M. A. Tius, G. A. Thakur, H. Zhou, A. L. Bowman, V. G. Shukla, Y. Peng and A. Makriyannis, *Bioorg. Med. Chem. Lett.*, 2012, **22**, 5322-5325.
- D. J. Drake, R.S. Jensen, J. Busch-Petersen, J.K. Kawakami, M.C. Fernandez-Garcia, P. Fan, A. Makriyannis, M.A. Tius, *J. Med. Chem.*, 1998, **41**, 3596-3608.
- L. Hanuš, A. Breuer, S. Tchilibon, S. Shiloah, D. Goldenberg, M. Horowitz, R. G. Pertwee, R. A. Ross, R. Mechoulam and E. Fride, *P. Natl. Acad. Sci. USA*, 1999, **96**, 14228-14233.
- T. C. Ho, M. A. Tius, S. P. Nikas, N. K. Tran, F. Tong, H. Zhou, N. Zvonok and A. Makriyannis, *Bioorg. Med. Chem. Lett.*, 2021, **38**, 127882-127889.

- A. C. Howlett, G. H. Wilken, J. J. Pigg, D. B. Houston, R. Lan, Q. Liu and A. Makriyannis, *J. Neurochem.*, 2000, **74**, 2174-2181.
- T. Hua, K. Vemuri, M. Pu, L. Qu, G. W. Han, Y. Wu, S. Zhao, W. Shui, S. Li, A. Korde, R. B. Laprairie, E. L. Stahl, J.-H. Ho, N. Zvonok, H. Zhou, I. Kufareva, B. Wu, Q. Zhao, M. A. Hanson, L. M. Bohn, A. Makriyannis, R. C. Stevens and Z.-J. Liu, *Cell*, 2016, **167**, 750-762.e714.
- T. Hua, X. Li, L. Wu, C. Iliopoulos-Tsoutsouvas, Y. Wang, M. Wu, L. Shen, C. A. Johnston, S. P. Nikas, F. Song, X. Song, S. Yuan, Q. Sun, Y. Wu, S. Jiang, T. W. Grim, O. Benchama, E. L. Stahl, N. Zvonok, S. Zhao, L. M. Bohn, A. Makriyannis and Z.-J. Liu, *Cell*, 2020, **180**, 655-665.e18.
- M. Krishnamurthy, A. M. Ferreira, B. M. Moore, *Bioorg. Med. Chem. Lett.* 2003, **13**, 3487-3490.
- S. Jiang, C. Iliopoulos-Tsoutsouvas, F. Tong, C. A. Brust, C. M. Keenan, J. G. Raghav, T. Hua, S. Wu, J.-H. Ho, Y. Wu, T. W. Grim, N. Zvonok, G. A. Thakur, Z.-J. Liu, K. A. Sharkey, L. M. Bohn, S. P. Nikas and A. Makriyannis, *J. Med. Chem.*, 2021, **64**, 3870-3884.
- R. Lan, Q. Liu, P. Fan, S. Lin, S. R. Fernando, D. McCallion, R. Pertwee and A. Makriyannis, *J. Med. Chem.*, 1999, **42**, 769-776.
- X. Li, T. Hua, K. Vemuri, J. H. Ho, Y. Wu, L. Wu, P. Popov, O. Benchama, N. Zvonok, K. Locke, L. Qu, G. W. Han, M. R. Iyer, R. Cinar, N. J. Coffey, J. Wang, M. Wu, V. Katritch, S. Zhao, G. Kunos, L. M. Bohn, A. Makriyannis, R. C. Stevens and Z. J. Liu, *Cell*, 2019, **176**, 459-467.e413.
- R. W. Mercier, Y. Pei, L. Pandarinathan, D. R. Janero, J. Zhang and A. Makriyannis, *Chem. Biol.*, 2010, **17**, 1132-1142.
- A. Makriyannis, Q. Liu, PCT Int. Appl. WO 2001029007, 200.
- P. Mukhopadhyay, M. Baggelaar, K. Erdelyi, Katalin, Z. Cao, R. Cinar, F. Fezza, B. Ignatowska-Janlowska, J. Wilkerson, N. van Gils, T. Hansen, M. Ruben, M. Soethoudt, L. Heitman, G. Kunos, M. Maccarrone, A. Lichtman, P. Pacher, M. van der Stelt. *Brit. J. Pharmacol.*, 2016, **173**, 446-458.
- S. P. Nikas, S. O. Alapafuja, I. Papanastasiou, C. A. Paronis, V. G. Shukla, D. P. Papahatjis, A. L. Bowman, A. Halikhedkar, X. Han, A. Makriyannis, *J. Med. Chem.*, 2010, **53**, 6996-7010.
- G. Ogawa, M. A. Tius, H. Zhou, S. P. Nikas, A. Halikhedkar, S. Mallipeddi and A. Makriyannis, *J. Med. Chem.*, 2015, **58**, 3104-3116.
- Y. Pei, R. W. Mercier, J. K. Anday, G. A. Thakur, A. M. Zvonok, D. Hurst, P. H. Reggio, D. R. Janero and A. Makriyannis, *Chem. Biol.*, 2008, **15**, 1207-1219.
- R. P. Picone, A. D. Khanolkar, W. Xu, L. A. Ayotte, G. A. Thakur, D. P. Hurst, M. E. Abood, P. H. Reggio, D. J. Fournier and A. Makriyannis, *Mol. Pharmacol.*, 2005, **68**, 1623-1635.
- J. Y. Shim, W. J. Welsh, E. Cartier, J. L. Edwards and A. C. Howlett, *J. Med. Chem.*, 2002, **45**, 1447-1459.
- M. Soethoudt, U. Grether, J. Fingerle, T. W. Grim, F. Fezza, L. de Petrocellis, C. Ullmer, B. Rothenhäusler, C. Perret, N. van Gils, D. Finlay, C. MacDonald, A. Chicca, M. D. Gens, J. Stuart, H de Vries, N. Mastrangelo, L. Xia, G. Alachouzos, M. P. Baggelaar, A. Martella, E. D. Mock, H. Deng, L. H. Heitman, M. Connor, V. Di Marzo, J. Gertsch, A. H. Lichtman, M. Maccarrone, P. Pacher, M. Glass, M. van der Stelt. *Nat. Comm.* 2017, **8**, 13958.
- M. Soethoudt, S. C. Stolze, M. V. Westphal, L. van Stralen, A. Martella, E. J. van Rooden, W. Guba, Z. V. Varga, H. Deng, S. I. van Kasteren, U. Grether, A. P. Ijzerman, P. Pacher, E. M. Carreira, H. S. Overkleeft, A. Ioan-Facsinay, L. H. Heitman and M. van der Stelt, *J. Am. Chem. Soc.*, 2018, **140**, 6067-6075.
- M. V. Westphal, R. C. Sarott, E. A. Zirwes, A. Osterwald, W. Guba, C. Ullmer, U. Grether and E. M. Carreira, *Chem. Eur. J.*, 2020, **26**, 1380-1387.
- H. Zhou, Y. Peng, A. Halikhedkar, P. Fan, D. R. Janero, G. A. Thakur, R. W. Mercier, X. Sun, X. Ma and A. Makriyannis, *ACS. Chem. Neurosci.*, 2017, **8**, 1338-1347.

Filename: Supplementary\_Info\_Vernall\_v2.docx  
Directory: /Users/veran35p/Library/Containers/com.microsoft.Word/Data/Documents  
Template: /Users/veran35p/Library/Group Containers/UBF8T346G9.Office/User Content.localized/Templates.localized/Normal.dotm  
Title:  
Subject:  
Author: Ian Liddle  
Keywords:  
Comments:  
Creation Date: 04/03/2022 10:33:00  
Change Number: 57  
Last Saved On: 06/03/2022 13:06:00  
Last Saved By: Andrea Vernall  
Total Editing Time: 71 Minutes  
Last Printed On: 06/03/2022 13:07:00  
As of Last Complete Printing  
Number of Pages: 5  
Number of Words: 1,550 (approx.)  
Number of Characters: 8,836 (approx.)
